# Supplementary material
Source: PubMed Central journal article supplement (PMC5893134)
Supplement: NIHMS955181-supplement-Online_Resource_1.pdf [file NIHMS955181-supplement-Online_Resource_1.pdf]

Title: Geospatial approaches to cancer control and population sciences at the United States cancer centers

Journal Name: *Cancer Causes & Control*

Authors: Robert W Korycinski, Bethany L Tennant, Michelle A Cawley, Bonny Bloodgood, April Y Oh, David Berrigan

Corresponding Author: Robert W Korycinski, Division of Cancer Prevention, National Cancer Institute, Bethesda MD 20892; robert.korycinski@nih.gov

**Online Resource 1** The NCI-designated Cancer Centers name variation search thread

(UAB Comprehensive Cancer Center OR University of Alabama Birmingham Comprehensive Cancer Center OR University of Alabama at Birmingham Comprehensive Cancer Center OR Arizona Cancer Center OR Chao Family Comprehensive Cancer Center OR City of Hope Comprehensive Cancer Center OR Jonsson Comprehensive Cancer Center OR Salk Institute Cancer Center OR Sanford Burnham Prebys Medical Discovery Institute OR Stanford Cancer Institute OR Davis Comprehensive Cancer Center OR Davis Cancer Center OR Moores Cancer Center OR UCSD Cancer Center OR San Diego Cancer Center OR Helen Diller Family Comprehensive Cancer Center OR University of California at San Francisco Cancer Research Institute OR Norris Comprehensive Cancer Center OR Colorado Cancer Center OR Colorado Comprehensive Cancer Center OR Yale Cancer Center OR Yale Comprehensive Cancer Center OR Lombardi Comprehensive Cancer Center OR Moffitt Cancer Center OR Winship Cancer Institute OR University of Hawaii Cancer Center OR Lurie Comprehensive Cancer Center OR University of Chicago Comprehensive Cancer Center OR Simon Cancer Center OR Indiana University Cancer Center OR Purdue University Center for Cancer Research OR Purdue University Center Cancer Research OR Holden Comprehensive Cancer Center OR Kansas Cancer Center OR Markey Cancer Center OR Jackson Laboratory Cancer Center OR Sidney Kimmel Comprehensive Cancer Center OR University of Maryland Marlene and Stewart Greenebaum Cancer Center OR Greenebaum Cancer Center OR Dana Farber Cancer Institute OR Dana Farber Cancer Institute Comprehensive Cancer Center OR Dana Farber/Harvard Cancer Center OR (Beth Israel Deaconess Medical Center AND Cancer Center) OR (Brigham and Womens Hospital AND Cancer Center) OR (Harvard Medical School AND Cancer Center) OR (Harvard School of Public Health AND Cancer Center) OR (Massachusetts General Hospital AND Cancer Center) OR Koch Institute Integrative Cancer Research OR Karmanos Cancer Institute OR University of Michigan Comprehensive Cancer Center OR Masonic Cancer Center OR University Minnesota Cancer Center OR University of Minnesota Cancer Center OR Mayo Clinic Cancer Center OR Siteman Cancer Center OR Buffett Cancer Center OR Eppley Cancer Center OR Norris Cotton Cancer Center OR Cancer Institute of New Jersey OR University of New Mexico Cancer Center OR Albert Einstein Cancer Center OR Cold Spring Harbor Laboratory Cancer Center OR Irving Comprehensive Cancer Center OR Perlmutter Cancer Center OR Kaplan Cancer Center OR NYU Cancer Center OR New York University Cancer Center OR NYU Cancer Institute OR New York University Cancer Institute OR Memorial Sloan-Kettering Cancer Center OR Roswell Park Cancer Institute OR Duke Cancer Institute OR Comprehensive Cancer Center Wake Forest University OR Comprehensive Cancer Center of Wake Forest University OR Lineberger Comprehensive Cancer Center OR Case Comprehensive Cancer Center OR (Case Western Reserve AND Cancer Center) OR (University Hospitals Case Medical Center AND Cancer Center) OR (Cleveland Clinic AND Cancer Center) OR Ohio State University Comprehensive Cancer Center OR Comprehensive Cancer Center Ohio State University OR Knight Cancer Institute OR Oregon Cancer Center OR Abramson Cancer Center OR Fox Chase Cancer Center OR Sidney Kimmel Cancer Center OR Sidney Kimmel Cancer Center at Thomas Jefferson University OR Pittsburgh Cancer Institute OR University of Pittsburgh Cancer Institute OR Cancer Institute University of Pittsburgh OR Wistar Institute Cancer Center OR Hollings Cancer Center OR St Jude Children's Research Hospital OR St Jude Childrens Research Hospital OR Vanderbilt-Ingram Cancer Center OR Cancer Therapy and

Research Center OR Duncan Cancer Center OR Simmons Cancer Center OR MD Anderson Cancer Center OR Huntsman Cancer Institute OR Massey Cancer Center OR University of Virginia Cancer Center OR Fred Hutchinson University of Washington Cancer Consortium OR Fred Hutchinson/University of Washington Cancer Consortium OR Fred Hutchinson Cancer Research Center OR Fred Hutchinson Cancer Consortium OR (University of Washington AND Cancer Center) OR (Seattle Cancer Care Alliance AND Cancer Center) OR (Seattle Childrens AND Cancer Center) OR Carbone Cancer Center OR University of Wisconsin Cancer Center OR University Wisconsin Cancer Center)
