# Supplementary material
Source: PubMed Central journal article supplement (PMC5893134)
Supplement: NIHMS955181-supplement-Online_Resource_2.pdf [file NIHMS955181-supplement-Online_Resource_2.pdf]

Title: Geospatial approaches to cancer control and population sciences at the United States cancer centers

Journal Name: *Cancer Causes & Control*

Authors: Robert W Korycinski, Bethany L Tennant, Michelle A Cawley, Bonny Bloodgood, April Y Oh, David Berrigan

Corresponding Author: Robert W Korycinski, Division of Cancer Prevention, National Cancer Institute, Bethesda MD 20892; robert.korycinski@nih.gov

**Online Resource 2** The number of geospatial publications with authors affiliated at each NCI-designated Cancer Center

| NCI-designated Cancer Center <sup>a</sup>                            | Number of Publications <sup>b</sup> | Date of First Publication |
|----------------------------------------------------------------------|-------------------------------------|---------------------------|
| 1. Fred Hutchinson/University of Washington Cancer Consortium (1976) | 127                                 | 1980                      |
| 2. Dana-Farber/Harvard Cancer Center (1973)                          | 109                                 | 1994                      |
| 3. The University of Texas MD Anderson Cancer Center (1971)          | 109                                 | 1997                      |
| 4. Memorial Sloan-Kettering Cancer Center (1971)                     | 73                                  | 1981                      |
| 5. Alvin J Siteman Cancer Center (2001)                              | 55                                  | 2001                      |
| 6. Roswell Park Cancer Institute (1974)                              | 36                                  | 1992                      |
| 7. Fox Chase Cancer Center (1974)                                    | 31                                  | 1984                      |
| 8. Norris Cotton Cancer Center at Dartmouth (1978)                   | 29                                  | 1988                      |
| 9. Moffitt Cancer Center (1998)                                      | 26                                  | 1999                      |
| 10. Huntsman Cancer Institute (1986)                                 | 23                                  | 1996                      |
| 11. USC Norris Comprehensive Cancer Center (1973)                    | 18                                  | 1996                      |
| 12. The Cancer Institute of New Jersey (1997)                        | 16                                  | 2004                      |
| 13. University of Hawaii Cancer Center (1996)                        | 15                                  | 1997                      |
| 14. Winship Cancer Institute (2009)                                  | 14                                  | 2011                      |
| 15. Case Comprehensive Cancer Center (1987)                          | 13                                  | 1995                      |
| 16. UNC Lineberger Comprehensive Cancer Center (1975)                | 13                                  | 1992                      |
| 17. Harold C Simmons Cancer Center (2010)                            | 12                                  | 2012                      |
| 18. Masonic Cancer Center (1998)                                     | 12                                  | 2005                      |
| 19. Vanderbilt-Ingram Cancer Center (1995)                           | 12                                  | 2003                      |
| 20. Jonsson Comprehensive Cancer Center (1976)                       | 11                                  | 1989                      |
| 21. The Barbara Ann Karmanos Cancer Institute (1978)                 | 11                                  | 1996                      |
| 22. University of Wisconsin Carbone Cancer Center (1973)             | 11                                  | 2003                      |

<sup>a</sup> Includes year of NCI designation

<sup>b</sup> Numbers do not sum to 802 because shared abstracts are attributed to multiple cancer centers

|                                                                    |    |      |
|--------------------------------------------------------------------|----|------|
| 23. Yale Cancer Center (1974)                                      | 11 | 2008 |
| 24. Arizona Cancer Center (1978)                                   | 10 | 2001 |
| 25. University of Pittsburgh Cancer Institute (1988)               | 10 | 2003 |
| 26. Stanford Cancer Institute (2007)                               | 10 | 2010 |
| 27. The Ohio State University Comprehensive Cancer Center (1976)   | 10 | 2011 |
| 28. Abramson Cancer Center (1974)                                  | 9  | 2006 |
| 29. Georgetown Lombardi Comprehensive Cancer Center (1974)         | 9  | 2006 |
| 30. Herbert Irving Comprehensive Cancer Center (1972)              | 9  | 2004 |
| 31. UC San Diego Moores Cancer Center (1978)                       | 8  | 1996 |
| 32. University of New Mexico Cancer Center (2005)                  | 8  | 2008 |
| 33. Dan L Duncan Cancer Center (2007)                              | 7  | 2011 |
| 34. Laura and Isaac Perlmutter Cancer Center at NYU Langone (1975) | 7  | 2001 |
| 35. Massey Cancer Center (1975)                                    | 7  | 1995 |
| 36. UCSF Helen Diller Family Comprehensive Cancer Center (1999)    | 7  | 2007 |
| 37. Robert H Lurie Comprehensive Cancer Center (1997)              | 6  | 2007 |
| 38. University of Michigan Comprehensive Cancer Center (1988)      | 6  | 2005 |
| 39. Chao Family Comprehensive Cancer Center (1994)                 | 5  | 2008 |
| 40. City of Hope Comprehensive Cancer Center (1981)                | 5  | 2008 |
| 41. St Jude Children's Research Hospital (1977)                    | 5  | 1997 |
| 42. Holden Comprehensive Cancer Center (2000)                      | 4  | 2014 |
| 43. Markey Cancer Center (2013)                                    | 4  | 2013 |
| 44. Cancer Therapy and Research Center (1993)                      | 4  | 2012 |
| 45. UC Davis Comprehensive Cancer Center (2002)                    | 4  | 2010 |
| 46. Duke Cancer Institute (1972)                                   | 3  | 2013 |
| 47. Indiana University Melvin and Bren Simon Cancer Center (1999)  | 3  | 2009 |

|                                                                                |   |      |
|--------------------------------------------------------------------------------|---|------|
| 48. Sidney Kimmel Comprehensive Cancer Center (1973)                           | 3 | 2007 |
| 49. The University of Chicago Comprehensive Cancer Center (1973)               | 3 | 1994 |
| 50. UAB Comprehensive Cancer Center (1971)                                     | 3 | 2005 |
| 51. Sidney Kimmel Cancer Center at Thomas Jefferson University (1995)          | 2 | 2012 |
| 52. University of Maryland Marlene and Stewart Greenebaum Cancer Center (2008) | 2 | 2011 |
| 53. Albert Einstein Cancer Center (1972)                                       | 1 | 2009 |
| 54. Fred and Pamela Buffett Cancer Center (1999)                               | 1 | 2012 |
| 55. Hollings Cancer Center (2009)                                              | 1 | 2010 |
| 56. Knight Cancer Institute (1997)                                             | 1 | 2013 |
| 57. Mayo Clinic Cancer Center (1973)                                           | 1 | 2013 |
| 58. The Comprehensive Cancer Center of Wake Forest University (1972)           | 1 | 2013 |
| 59. The University of Kansas Cancer Center (2012)                              | 1 | 2014 |
| 60. University of Colorado Cancer Center (1988)                                | 1 | 2013 |
| 61. Cold Spring Harbor Laboratory Cancer Center (1987)                         | 0 | N/A  |
| 62. David H Koch Institute for Integrative Cancer Research at MIT (1974)       | 0 | N/A  |
| 63. Purdue University Center for Cancer Research (1978)                        | 0 | N/A  |
| 64. Salk Institute Cancer Center (1973)                                        | 0 | N/A  |
| 65. Sanford Burnham Prebys Medical Discovery Institute (1981)                  | 0 | N/A  |
| 66. The Jackson Laboratory Cancer Center (1983)                                | 0 | N/A  |
| 67. The Wistar Institute Cancer Center (1972)                                  | 0 | N/A  |
| 68. University of Virginia Cancer Center (1987)                                | 0 | N/A  |
